# Supplementary material for: Sequence representations after action-imagery practice of one-finger movements are effector-independent
Source: Springer Nature journal article supplement (doi:10.1007/s00426-022-01645-3), 2022-02-03
Supplement: MOESM1 [file 20099268]

## SUPPLEMENTAL MATERIAL

### **Sequence representations after action imagery practice of one-finger movements are effector independent**

Stephan F. Dahm <sup>1</sup>, Matthias Weigelt <sup>2</sup> & Martina Rieger <sup>1</sup>

<sup>1</sup> UMIT - University for Health Sciences Medical Informatics and Technology

<sup>2</sup>University Paderborn

#### **Overview**

This document includes additional analyses and descriptive statistics that may be of interest to some readers. In a first step, we report the analysis that includes the transfer direction (from left to right hand or vice versa), which is otherwise only briefly mentioned in the main manuscript. In a second step, we report standard errors of movement times, which are not reported in the manuscript. In a third step, we report analyses of the error rates.

## 1. Analysis of the direction of intermanual transfer

To investigate the effects of transfer direction on movement times, we calculated a mixed-model ANOVA with the between factors practice group (AIP, AEP, CP) and practice hand (left, right) and the within factors test hand (practice, transfer), sequence (practice, mirror, different), and session (1, 2, 3, 4, 5, 6). Means of the movement times are shown in Figure SM1 and the corresponding standard errors in Table SM1. Results of the ANOVA are shown in Table SM2. Here, we focus on the main effect and interactions with the factor ‘practice hand’.

The interaction between practice hand and test hand was significant. In the left-hand practice group, MTs were shorter in the right transfer hand ( $M = 4.8$  s) than in the left practice hand ( $M = 5$  s). In the right-hand practice group, MTs were shorter in the right practice hand ( $M = 5$  s) than in the left transfer hand ( $M = 5.2$  s). All remaining effects with the factor practice hand were not significant.

In short, participants performed faster with the right dominant hand than with the left non-dominant hand. Because this effect was already observed before any experimental manipulations in Session 1 and no significant further effects with the factor practice hand were observed, we decided to remove the factor practice hand from the analysis in the main manuscript.

**Figure SM1.** Means of movement times (in s) depending on test hand (practice, transfer), sequence (practice, mirror, different), and session (1, 2, 3, 4, 5, 6), separately for the practice groups (left-hand imagery practice, right-hand imagery practice, left-hand execution practice, right-hand execution practice, left-hand control practice, and right-hand control practice).

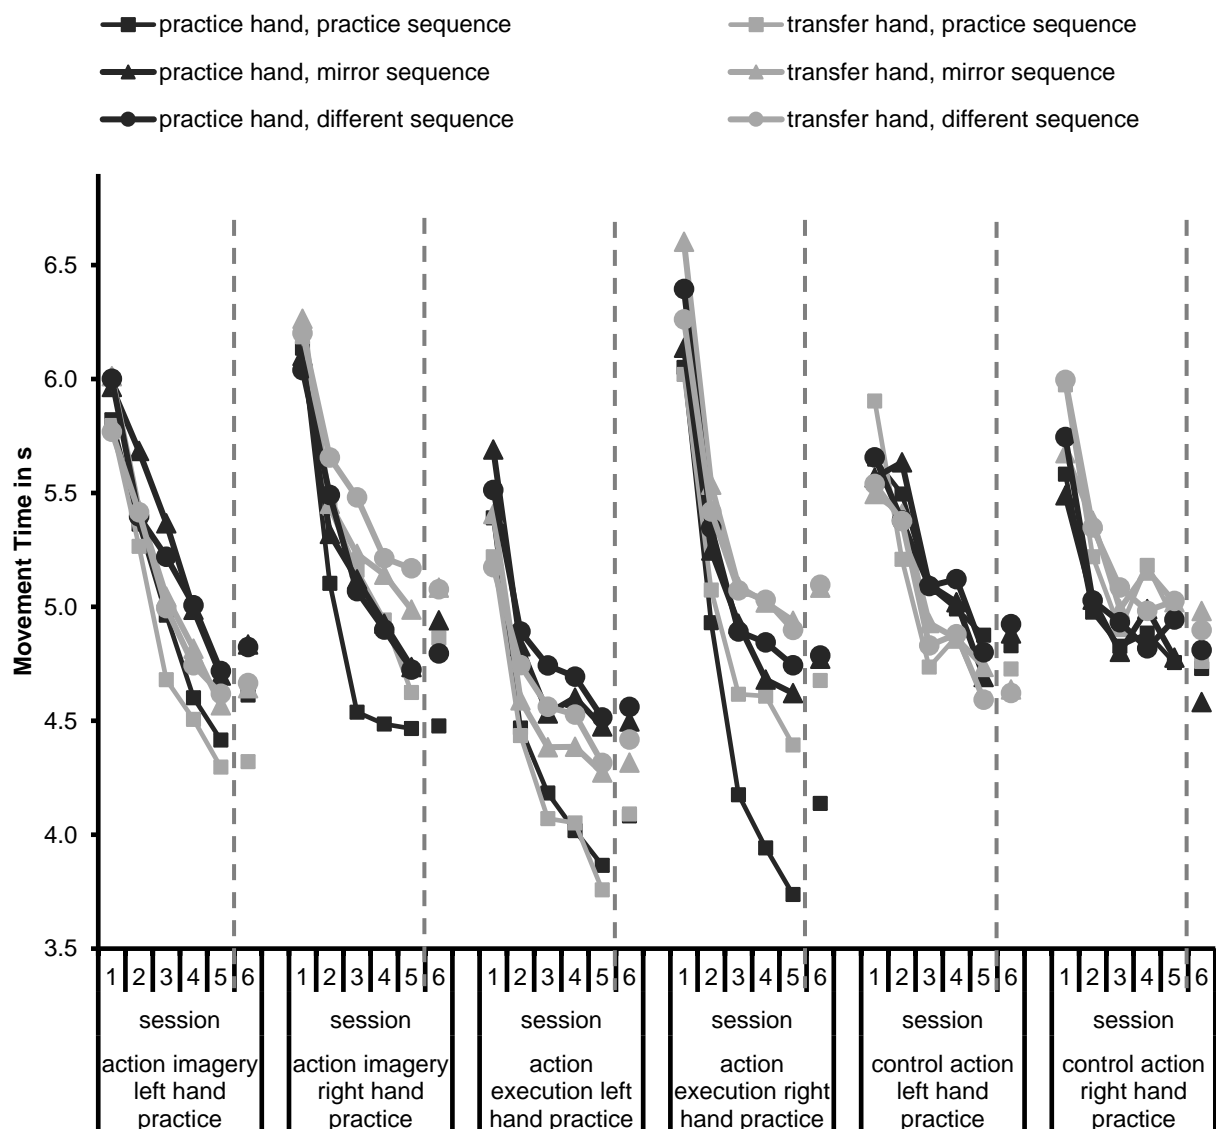

**Table SM1.** Standard errors of the means of movement times (in ms) depicted in Figure SM1 depending on session (1, 2, 3, 4, 5, 6), test hand (practice, transfer), and sequence (practice, mirror, different), separated for the practice groups (left-hand imagery practice, right-hand imagery practice, left-hand execution practice, right-hand execution practice, left-hand control practice, and right-hand control practice).

|                           |                     | Practice hand     |                 |                    | Transfer hand     |                 |                    |     |
|---------------------------|---------------------|-------------------|-----------------|--------------------|-------------------|-----------------|--------------------|-----|
|                           |                     | Practice sequence | Mirror sequence | Different sequence | Practice sequence | Mirror sequence | Different sequence |     |
| Action imagery practice   | Left hand practice  | Session 1         | 223             | 259                | 252               | 242             | 314                | 200 |
|                           |                     | Session 2         | 182             | 248                | 149               | 245             | 211                | 195 |
|                           |                     | Session 3         | 141             | 213                | 156               | 184             | 225                | 195 |
|                           |                     | Session 4         | 144             | 178                | 159               | 166             | 194                | 172 |
|                           |                     | Session 5         | 171             | 182                | 167               | 189             | 203                | 171 |
|                           |                     | Session 6         | 175             | 174                | 176               | 177             | 192                | 193 |
|                           | Right hand practice | Session 1         | 234             | 255                | 262               | 301             | 241                | 295 |
|                           |                     | Session 2         | 262             | 211                | 248               | 218             | 262                | 247 |
|                           |                     | Session 3         | 159             | 238                | 213               | 198             | 258                | 244 |
|                           |                     | Session 4         | 155             | 246                | 230               | 158             | 220                | 201 |
|                           |                     | Session 5         | 139             | 188                | 157               | 149             | 180                | 214 |
|                           |                     | Session 6         | 135             | 179                | 148               | 141             | 193                | 163 |
| Action execution practice | Left hand practice  | Session 1         | 225             | 282                | 195               | 197             | 193                | 141 |
|                           |                     | Session 2         | 123             | 172                | 154               | 132             | 130                | 155 |
|                           |                     | Session 3         | 116             | 136                | 175               | 122             | 122                | 127 |
|                           |                     | Session 4         | 142             | 149                | 148               | 169             | 158                | 150 |
|                           |                     | Session 5         | 131             | 125                | 167               | 99              | 166                | 147 |
|                           |                     | Session 6         | 142             | 145                | 126               | 143             | 135                | 128 |
|                           | Right hand practice | Session 1         | 261             | 267                | 256               | 223             | 252                | 204 |
|                           |                     | Session 2         | 206             | 185                | 206               | 200             | 214                | 214 |
|                           |                     | Session 3         | 160             | 235                | 177               | 169             | 195                | 177 |
|                           |                     | Session 4         | 152             | 187                | 217               | 166             | 174                | 198 |
|                           |                     | Session 5         | 166             | 185                | 225               | 157             | 222                | 199 |
|                           |                     | Session 6         | 194             | 194                | 219               | 177             | 244                | 195 |
| Control practice          | Left hand practice  | Session 1         | 232             | 230                | 246               | 277             | 337                | 237 |
|                           |                     | Session 2         | 255             | 278                | 256               | 224             | 299                | 318 |
|                           |                     | Session 3         | 222             | 163                | 180               | 212             | 230                | 251 |
|                           |                     | Session 4         | 204             | 211                | 212               | 204             | 223                | 216 |
|                           |                     | Session 5         | 213             | 148                | 193               | 194             | 212                | 171 |
|                           |                     | Session 6         | 155             | 185                | 177               | 149             | 181                | 163 |
|                           | Right hand practice | Session 1         | 232             | 217                | 219               | 263             | 200                | 216 |
|                           |                     | Session 2         | 196             | 201                | 155               | 204             | 180                | 165 |
|                           |                     | Session 3         | 236             | 171                | 159               | 174             | 162                | 177 |
|                           |                     | Session 4         | 151             | 189                | 174               | 186             | 147                | 157 |
|                           |                     | Session 5         | 167             | 169                | 207               | 173             | 174                | 202 |
|                           |                     | Session 6         | 219             | 180                | 195               | 215             | 209                | 211 |

**Table SM2.** Statistical values of the ANOVA on MTs. Factors and factor levels were practice hand (left, right), practice group (action imagery practice, action execution practice, control practice), sequence (practice, mirror, different), test hand (practice, transfer), and session (1, 2, 3, 4, 5, 6). Only the main effect of and interactions with practice hand are shown.

|                                                                 | <i>F</i> | <i>df1, df2</i> | <i>p</i> | $\eta^2_p$ |
|-----------------------------------------------------------------|----------|-----------------|----------|------------|
| Practice hand                                                   | 2.9      | 1, 147          | .091     | .02        |
| Practice hand x Practice group                                  | 1.2      | 2, 147          | .294     | .02        |
| Practice hand x Test hand                                       | 68.9     | 1, 147          | <.001    | .32        |
| Practice hand x Sequence                                        | 1.9      | 2, 294          | .158     | .01        |
| Practice hand x Session                                         | 2.3      | 3.4, 495.8      | .066     | .02        |
| Practice hand x Practice group x Test hand                      | 0.2      | 2, 147          | .833     | <.01       |
| Practice hand x Practice group x Sequence                       | 1        | 4, 294          | .395     | .01        |
| Practice hand x Practice group x Session                        | 1.4      | 6.7, 495.8      | .193     | .02        |
| Practice hand x Test hand x Session                             | 1.3      | 3.7, 543.3      | .258     | .01        |
| Practice hand x Test hand x Sequence                            | 0.3      | 2, 294          | .725     | <.01       |
| Practice hand x Sequence x Session                              | 0.7      | 7.2, 1057       | .636     | .01        |
| Practice hand x Practice group x Test hand x Sequence           | 1.1      | 4, 294          | .361     | .02        |
| Practice hand x Practice group x Test hand x Session            | 0.7      | 7.4, 543.3      | .683     | .01        |
| Practice hand x Test hand x Sequence x Session                  | 1.2      | 8.2, 1202.8     | .293     | .01        |
| Practice hand x Practice group x Test hand x Sequence x Session | 0.8      | 16.4, 1202.8    | .673     | .01        |

## 2. Standard errors of movement times in test blocks

Table SM3 shows the standard errors of the mean of movement times depicted in Figure 2 of the main manuscript, depending on practice group (action imagery practice, action execution practice, control practice), hand (practice, transfer), session (1, 2, 3, 4, 5, 6), and sequence (practice, mirror, different).

**Table SM3.** Standard errors of the mean of movement times (in ms) depending on session (1, 2, 3, 4, 5, 6), hand (practice, transfer), and sequence (practice, mirror, different), separately for the practice groups (action imagery practice, action execution practice, control practice).

|                           |           | Practice hand     |                 |                    | Transfer hand     |                 |                    |
|---------------------------|-----------|-------------------|-----------------|--------------------|-------------------|-----------------|--------------------|
|                           |           | Practice sequence | Mirror sequence | Different sequence | Practice sequence | Mirror sequence | Different sequence |
| Action imagery practice   | Session 1 | 163               | 181             | 181                | 197               | 193             | 185                |
|                           | Session 2 | 164               | 162             | 149                | 162               | 170             | 160                |
|                           | Session 3 | 110               | 161             | 134                | 140               | 172             | 162                |
|                           | Session 4 | 106               | 155             | 143                | 118               | 149             | 137                |
|                           | Session 5 | 108               | 130             | 113                | 120               | 137             | 144                |
|                           | Session 6 | 108               | 124             | 113                | 117               | 139             | 127                |
| Action execution practice | Session 1 | 175               | 196             | 168                | 157               | 175             | 141                |
|                           | Session 2 | 119               | 128             | 129                | 123               | 136             | 136                |
|                           | Session 3 | 96                | 133             | 124                | 107               | 120             | 111                |
|                           | Session 4 | 103               | 117             | 127                | 124               | 124             | 126                |
|                           | Session 5 | 104               | 108             | 137                | 99                | 142             | 127                |
|                           | Session 6 | 117               | 119             | 122                | 119               | 143             | 122                |
| Control practice          | Session 1 | 162               | 156             | 163                | 189               | 192             | 162                |
|                           | Session 2 | 163               | 174             | 149                | 150               | 171             | 175                |
|                           | Session 3 | 162               | 119             | 119                | 136               | 138             | 152                |
|                           | Session 4 | 125               | 140             | 137                | 138               | 133             | 131                |
|                           | Session 5 | 133               | 112             | 141                | 131               | 137             | 135                |
|                           | Session 6 | 134               | 130             | 131                | 131               | 139             | 134                |

### 3. Standard errors of movement times during practice

Table SM4 shows the standard errors of the mean of movement times depicted in Figure 3 in the main manuscript, depending on practice group (action imagery practice, action execution practice, control practice) and session (1, 2, 3, 4).

**Table SM3.** Standard errors of the mean of movement times during practice (in ms) depending on session (1, 2, 3, 4, 5, 6) separately for the practice groups (action imagery practice, action execution practice, control practice).

|           | Action imagery practice | Action execution practice | Control practice |
|-----------|-------------------------|---------------------------|------------------|
| Session 1 | 135                     | 130                       | 137              |
| Session 2 | 106                     | 102                       | 107              |
| Session 3 | 103                     | 99                        | 104              |
| Session 4 | 112                     | 108                       | 113              |

#### 4. Error rates

To investigate the practice effects on error rates and potential speed-accuracy tradeoffs, we calculated a mixed-model ANOVA with the between factor practice group (AIP, AEP, CP) and the within factors hand (practice, transfer), sequence (practice, mirror, different), and session (1, 2, 3, 4, 5, 6). Means of the error rates are shown in Figure SM2 and the corresponding standard errors in Table SM4. Results of the ANOVA are shown in Table SM5. The ANOVA revealed no significant effects.

**Figure SM2.** Means of error rates (in %) depending on hand (practice, transfer), sequence (practice, mirror, different), and session (1, 2, 3, 4, 5, 6), separately for the practice groups (action imagery practice, action execution practice, control practice).

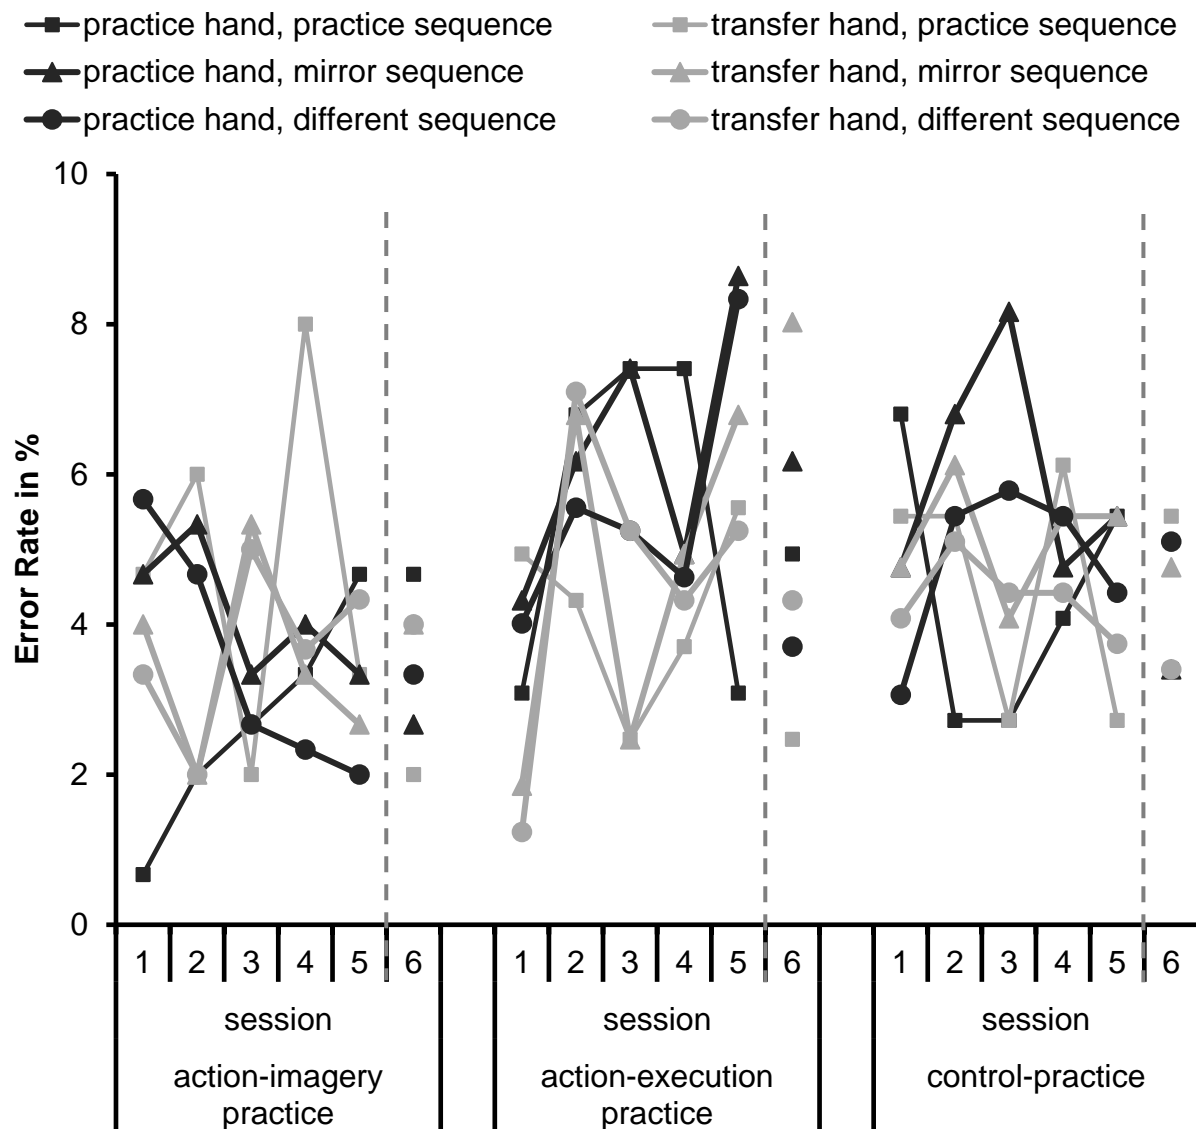

**Table SM4.** Standard errors of the mean of error rates (in %) depending on session (1, 2, 3, 4, 5, 6), hand (practice, transfer), and sequence (practice, mirror, different), separately for the practice groups (action imagery practice, action execution practice, control practice).

|                           |           | Practice hand     |                 |                    | Transfer hand     |                 |                    |
|---------------------------|-----------|-------------------|-----------------|--------------------|-------------------|-----------------|--------------------|
|                           |           | Practice sequence | Mirror sequence | Different sequence | Practice sequence | Mirror sequence | Different sequence |
| Action imagery practice   | Session 1 | 0.67              | 1.65            | 1.69               | 1.91              | 1.55            | 1.06               |
|                           | Session 2 | 1.13              | 1.99            | 1.26               | 2.27              | 1.13            | 1.03               |
|                           | Session 3 | 1.29              | 1.72            | 0.99               | 1.13              | 1.99            | 1.37               |
|                           | Session 4 | 1.43              | 1.55            | 0.83               | 2.03              | 1.43            | 1.19               |
|                           | Session 5 | 1.91              | 1.43            | 0.77               | 1.43              | 1.29            | 1.04               |
|                           | Session 6 | 1.91              | 1.29            | 1.06               | 1.13              | 1.55            | 1.22               |
| Action execution practice | Session 1 | 1.33              | 1.54            | 0.98               | 1.85              | 1.05            | 0.60               |
|                           | Session 2 | 2.04              | 1.98            | 1.32               | 1.54              | 1.84            | 1.43               |
|                           | Session 3 | 1.90              | 2.10            | 1.31               | 1.20              | 1.20            | 1.38               |
|                           | Session 4 | 2.10              | 1.63            | 1.20               | 1.69              | 1.85            | 1.26               |
|                           | Session 5 | 1.33              | 2.19            | 1.80               | 1.92              | 1.84            | 1.15               |
|                           | Session 6 | 1.85              | 1.78            | 1.05               | 1.20              | 2.32            | 1.10               |
| Control practice          | Session 1 | 1.94              | 1.94            | 1.05               | 1.78              | 1.68            | 1.24               |
|                           | Session 2 | 1.32              | 2.17            | 1.13               | 1.78              | 1.86            | 1.30               |
|                           | Session 3 | 1.32              | 2.29            | 1.50               | 1.32              | 1.58            | 1.27               |
|                           | Session 4 | 1.85              | 1.94            | 1.49               | 1.86              | 2.03            | 1.17               |
|                           | Session 5 | 1.78              | 1.78            | 1.27               | 1.32              | 1.78            | 1.00               |
|                           | Session 6 | 1.46              | 1.46            | 1.30               | 2.03              | 1.68            | 1.08               |

**Table SM5.** Statistical values of the ANOVA on error rates. Factors and factor levels were practice group (action imagery practice, action execution practice, control practice), sequence (practice, mirror, different), hand (practice, transfer), and session (1, 2, 3, 4, 5, 6).

|                                            | <i>F</i> | <i>df1, df2</i> | <i>p</i> | $\eta^2_p$ |
|--------------------------------------------|----------|-----------------|----------|------------|
| Practice group                             | 3        | 2, 150          | .051     | .04        |
| Hand                                       | 1        | 1, 150          | .328     | .01        |
| Sequence                                   | 1.8      | 1.9, 287.5      | .169     | .01        |
| Session                                    | 1.1      | 5, 750          | .348     | .01        |
| Practice group x Hand                      | 2.1      | 2, 150          | .125     | .03        |
| Practice group x Sequence                  | 0.3      | 3.8, 287.5      | .840     | .01        |
| Practice group x Session                   | 1.2      | 10, 750         | .286     | .02        |
| Hand x Sequence                            | 0.6      | 1.8, 277.3      | .561     | <.01       |
| Hand x Session                             | 0.7      | 5, 750          | .597     | .01        |
| Sequence x Session                         | 0.8      | 9.5, 1418.7     | .576     | .01        |
| Practice group x Hand x Sequence           | 0.6      | 3.7, 277.3      | .635     | .01        |
| Practice group x Hand x Session            | 0.8      | 10, 750         | .613     | .01        |
| Practice group x Sequence x Session        | 0.9      | 18.9, 1418.7    | .529     | .01        |
| Hand x Sequence x Session                  | 1        | 9.2, 1374.5     | .467     | .01        |
| Practice group x Hand x Sequence x Session | 1.5      | 18.3, 1374.5    | .073     | .02        |
